# Supplementary material
Source: HighWire-hosted journal article supplement (https://www.cmaj.ca/highwire/filestream/70636/field_highwire_adjunct_files/1/180276-image-2-at.pdf)

Appendix 2 (as supplied by the authors): (A) Computed tomography (CT) one month after glucocorticoid initiation showed that the hepatomegaly persisted with multiple mottled low-density lesions. (B) CT imaging three months after adalimumab therapy revealed a reduction in the hepatomegaly and decrease in the low-density areas.

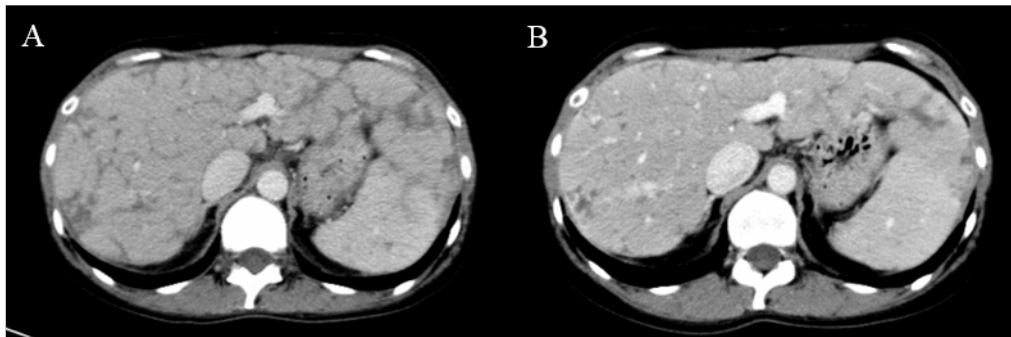

Supplement: 180276-image-2-at.pdf [file 180276-image-2-at.pdf]
